# Supplementary material for: Culture conditions defining glioblastoma cells behavior: what is the impact for novel discoveries?
Source: PubMed Central journal article supplement (PMC5620329; doi:10.18632/oncotarget.20193), 2017-08-11
Supplement: oncotarget-08-69185-s001.pdf [file oncotarget-08-69185-s001.pdf]

## **Culture conditions defining glioblastoma cells behavior: what is the impact for novel discoveries?**

### **SUPPLEMENTARY MATERIALS**

**Supplementary File 1: List of references cited in milestones addressed in Figure 1 -Timeline of important milestones in cell culture and GBM cell culture. See Supplementary\_File\_1**

**Supplementary File 2: Literature review of growth conditions used in GBM primary cultures. See Supplementary\_File\_2**

**Supplementary File 3: Qualitative summary of the data published in papers comparing the effect on several characteristics of differentiating versus non-differentiating culture conditions. See Supplementary\_File\_3**
